# Supplementary material for: Mixed responses of ant assemblages to Carpobrotus spp. and Rattus rattus eradications on a small Mediterranean island
Source: Research Square preprint supplement (doi:10.21203/rs.3.rs-3551654/v1), 2023-11-07
Supplement: Supplementary file 1 [file 91ca98f8cc6ddb4ce252d140.docx]

**Contrasted responses of ant assemblages to Carpobrotus spp. and Rattus rattus eradications on a small Mediterranean island**

Appendix A

**Table A1**: List of species and their individual counts by site. All species are Formicidae identified from the pitfall traps of the 10-year monitoring of the restoration program of Bagaud island

| **Species** | **CA1** | **CA2** | **RR1** | **RR2** | **CO1** | **CO2** |
| --- | --- | --- | --- | --- | --- | --- |
| Aphaenogaster dulciniae (Emery, 1924) |  |  | 1 |  |  |  |
| Aphaenogaster subterranea (Latreille, 1798) | 24 |  | 11 |  | 233 | 982 |
| Camponotus lateralis (Olivier, 1792) | 17 | 2 | 58 | 1 | 177 | 151 |
| Camponotus piceus (Leach, 1825) | 3 |  | 144 | 1 |  |  |
| Camponotus sylvaticus (Olivier, 1792) | 86 | 109 | 499 | 6 | 80 | 6 |
| Colobopsis truncata (Spinola, 1808) |  |  |  |  |  | 1 |
| Crematogaster auberti (Emery, 1869) |  |  |  |  | 1 | 11 |
| Crematogaster scutellaris (Olivier, 1792) | 35 | 123 | 634 | 119 | 709 | 495 |
| Crematogaster sordidula (Nylander, 1849) | 31 |  | 209 | 1 | 69 | 385 |
| Hypoponera eduardi (Forel, 1894) | 22 |  |  |  |  |  |
| Lasius gr. grandis | 1 | 150 | 1713 |  | 1122 | 42 |
| Lasius lasioides (Emery, 1869) | 20 | 1 | 20 | 1 | 2816 | 57 |
| Messor barbarus (Linnaeus, 1767) |  |  | 7 |  |  |  |
| Messor bouvieri (Bondroit, 1918) | 4488 | 2311 | 968 | 1694 | 4 | 2 |
| Pheidole pallidula (Nylander, 1849) | 1516 | 1327 | 2359 | 5503 | 120 | 41 |
| Plagiolepis pygmaea (Latreille, 1798) | 548 | 333 | 542 | 102 | 648 | 15 |
| Ponera testacea (Emery, 1895) |  |  |  |  |  | 3 |
| Solenopsis sp. | 55 | 89 | 169 | 135 | 169 | 11 |
| Temnothorax aveli (Bondroit, 1918) |  |  |  |  | 2 |  |
| Temnothorax gr. exilis | 74 | 25 | 115 | 152 | 17 | 1 |
| Temnothorax lichtensteini (Bondroit, 1918) | 2 |  |  |  | 33 |  |
| Temnothorax recedens (Nylander, 1856) | 3 | 57 | 81 | 214 |  |  |
| Temnothorax unifasciatus (Latreille, 1798) | 3 |  |  |  | 42 | 53 |
| Tetramorium gr. caespitum |  |  |  |  |  | 1 |

**Table A2**: Statistical results of the year effect on mean species richness per trap, mean abundance level per trap and assemblage composition (Bray-Curtis dissimilarity). Results were extracted from the generalized linear mixed models for the species richness and abundance, giving the Chisq statistic. Results from PERMANOVA tests were used for the assemblage composition, giving the F statistic. Bold numbers show the significant responses to the year factor and stars indicate the level of significance (p<0.05=*; p<0.01=**; p<0.001=***). Results are given per site.

|  | Species Richness | Abundance | Assemblage Composition |
| --- | --- | --- | --- |
|  | Chisq | Chisq | F |
| CA1 | **107.75***** | **158.65***** | **5.10***** |
| CA2 | **16.25**** | **57.01***** | **2.50***** |
| RR1 | **16.43**** | **22.97***** | **1.95**** |
| RR2 | 10.81 | **20.59***** | 1.20 |
| CO1 | 8.98 | **20.11**** | 1.40 |
| CO2 | 9.77 | 8.94 | **1.79*** |

**Table A3**: Statistical results of individual species abundance responses to the year per site. Results were extracted from the generalized linear mixed models. Given numbers are the Chisq parameter of the models. Bold numbers show the significant responses to the year factor and stars indicate the level of signifiance (p<0.05=*; p<0.01=**; p<0.001=***). For each site, species considered where these contributing up to 75% of the dissimilarity between pre and post eradication assemblages.

|  | CA1 | CA2 | RR1 | CO2 |
| --- | --- | --- | --- | --- |
| *Pheidole pallidula* | **128.34***** | **61.23***** | **15.74**** |  |
| *Messor bouvieri* | **22.11***** | **29.99***** | **16.81**** |  |
| *Plagiolepis pygmaea* | **60.96***** | 3.96 | **19.16**** |  |
| *Crematogaster scutellaris* |  | **20.41**** | 8.03 | 2.41 |
| *Lasius gr. Grandis* |  |  | **11.10*** |  |
| *Camponotus sylvaticus* |  |  | **35.23***** |  |
| *Aphaenogaster subterranea* |  |  |  | 7.75 |
| *Crematogaster sordidula* |  |  |  | **30.28***** |
